# Supplementary material
Source: PubMed Central journal article supplement (PMC10150657)

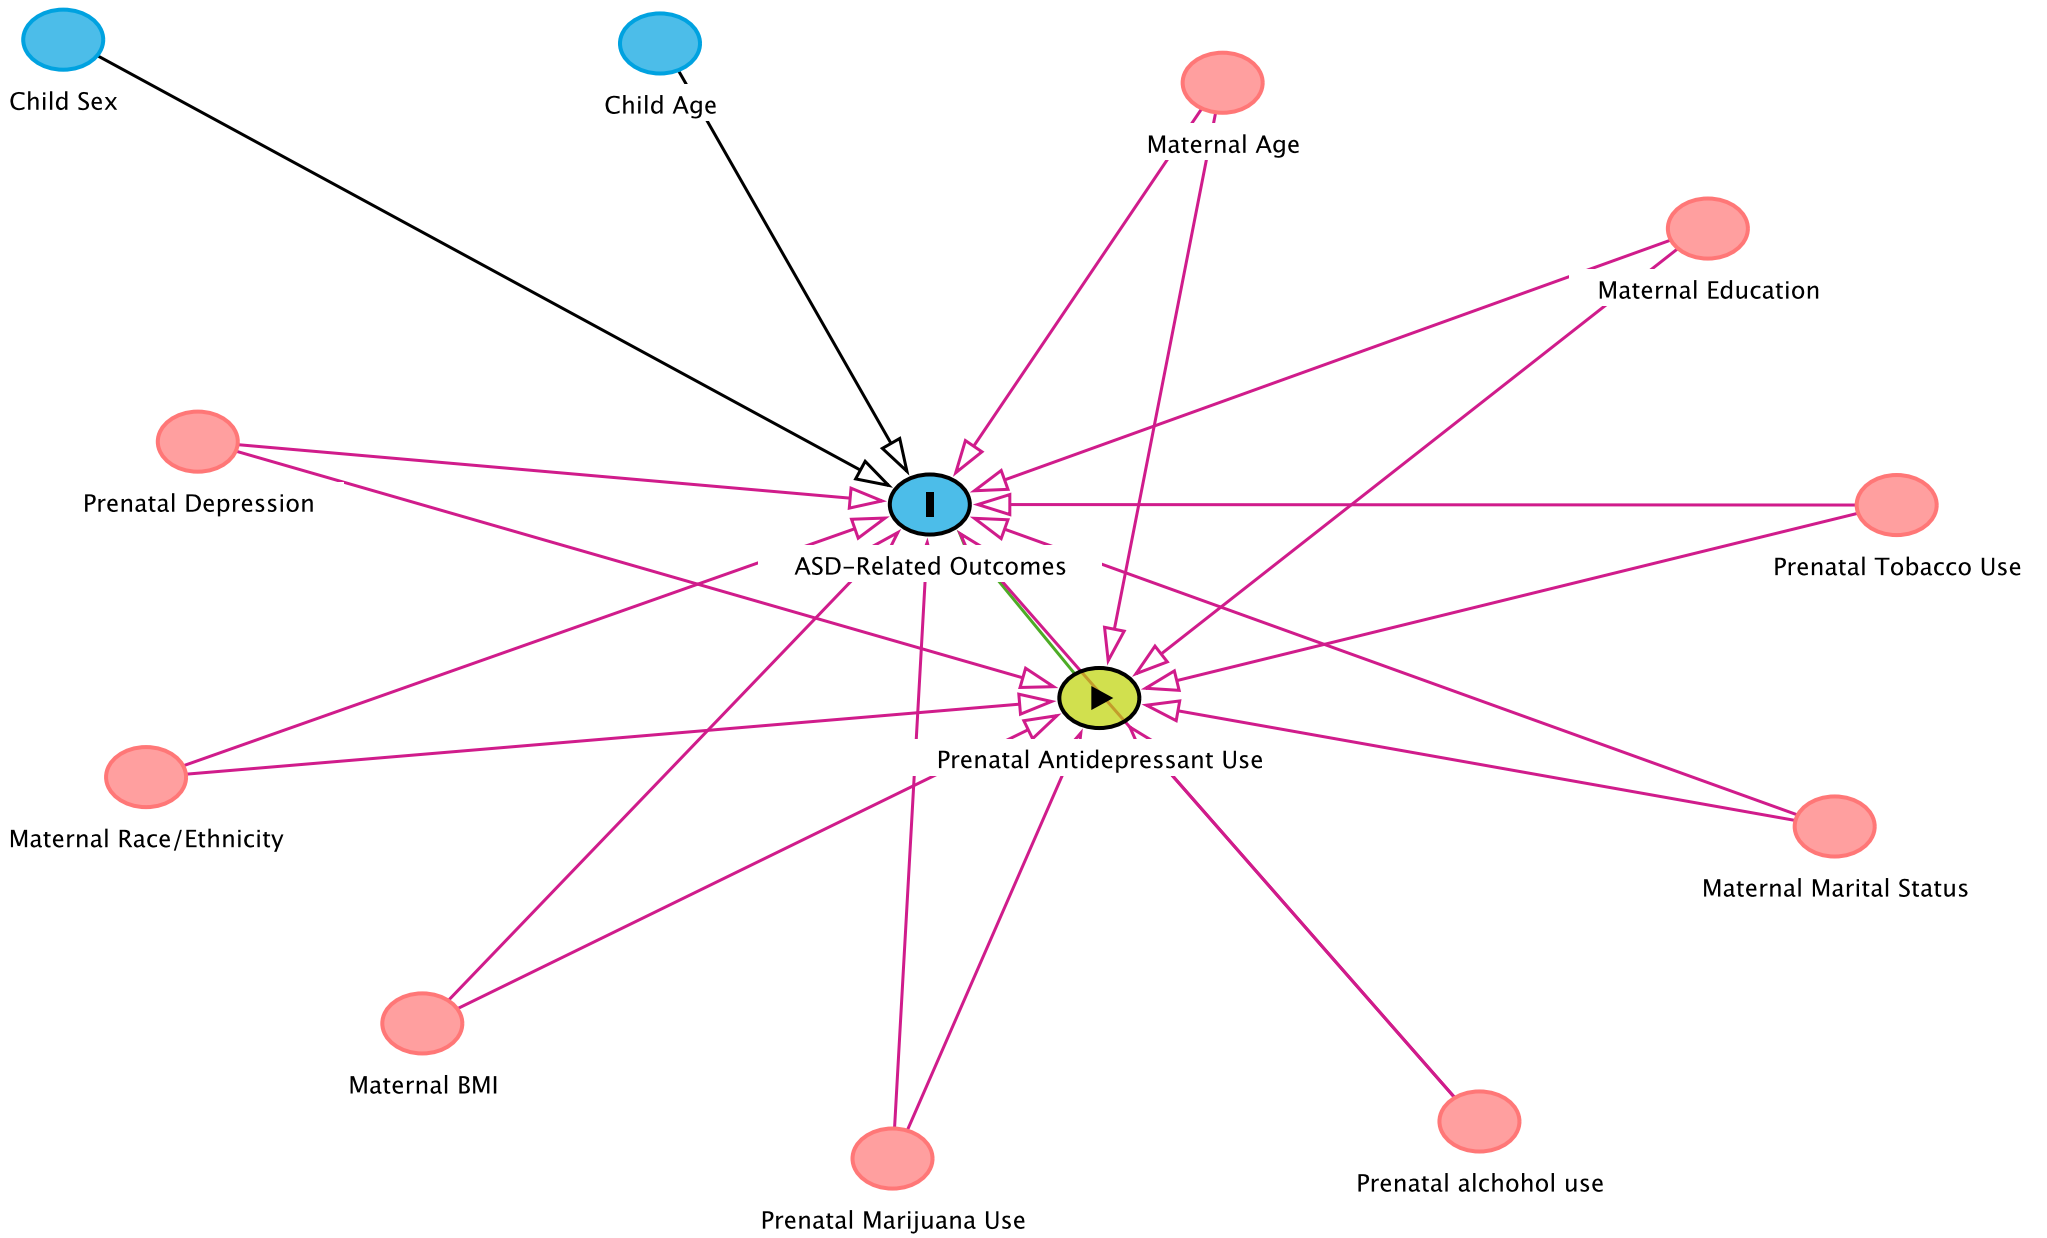

Supplement: NIHMS1889538-supplement-Supplemental_Figure.pdf [file NIHMS1889538-supplement-Supplemental_Figure.pdf]
